# Supplementary material for: Contribution of protein–protein interactions to the endothelial-barrier-stabilizing function of KRIT1
Source: PubMed Central journal article supplement (PMC8917353; doi:10.1242/jcs.258816), 2022-01-25
Supplement: joces-135-258816-s1.pdf [file joces-135-258816-s1.pdf]

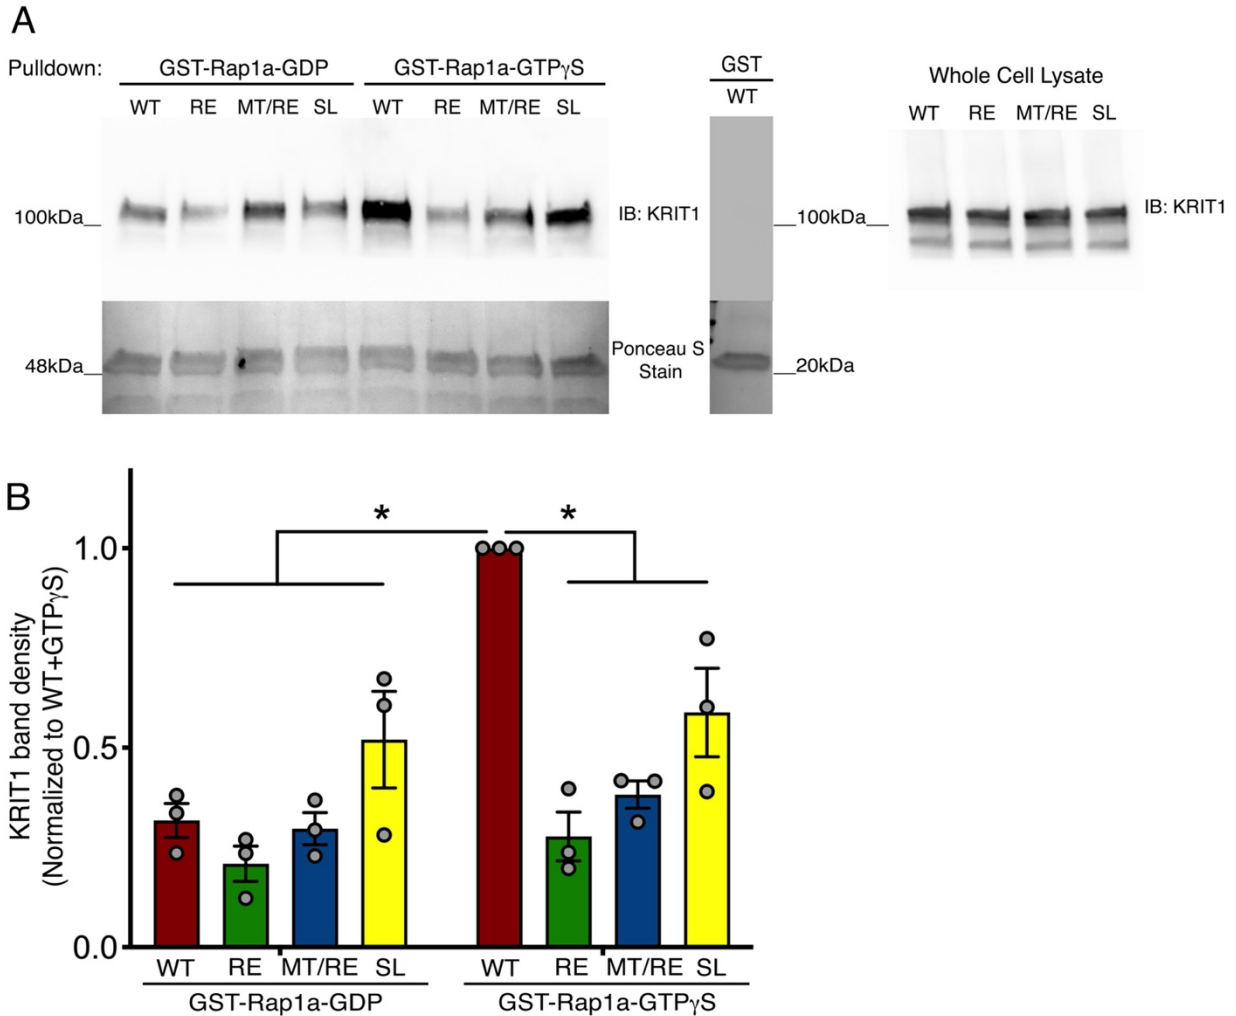

**Fig. S1. R452E mutation inhibits KRIT1-Rap1 binding.** Lysate from HEK293 cells transfected with KRIT1 constructs was applied to 10ug immobilized recombinant GST-Rap1a(WT) loaded with either GDP or GTP $\gamma$ S. Immobilized GST was also used as a binding control. Pulldowns were Western blotted for KRIT1. Recombinant GST and GST-Rap1a was detected by Ponceau S stain to verify equal loading. Representative blots and densitometry quantification are from n=3 independent experiments. Data shown are mean normalized band densities +/- SEM, normalized to WT KRIT1+Rap1-GTP $\gamma$ S. \*p<0.01 by Tukey's post-hoc testing vs. WT+GTP $\gamma$ S. p=0.0014 by two-way ANOVA.

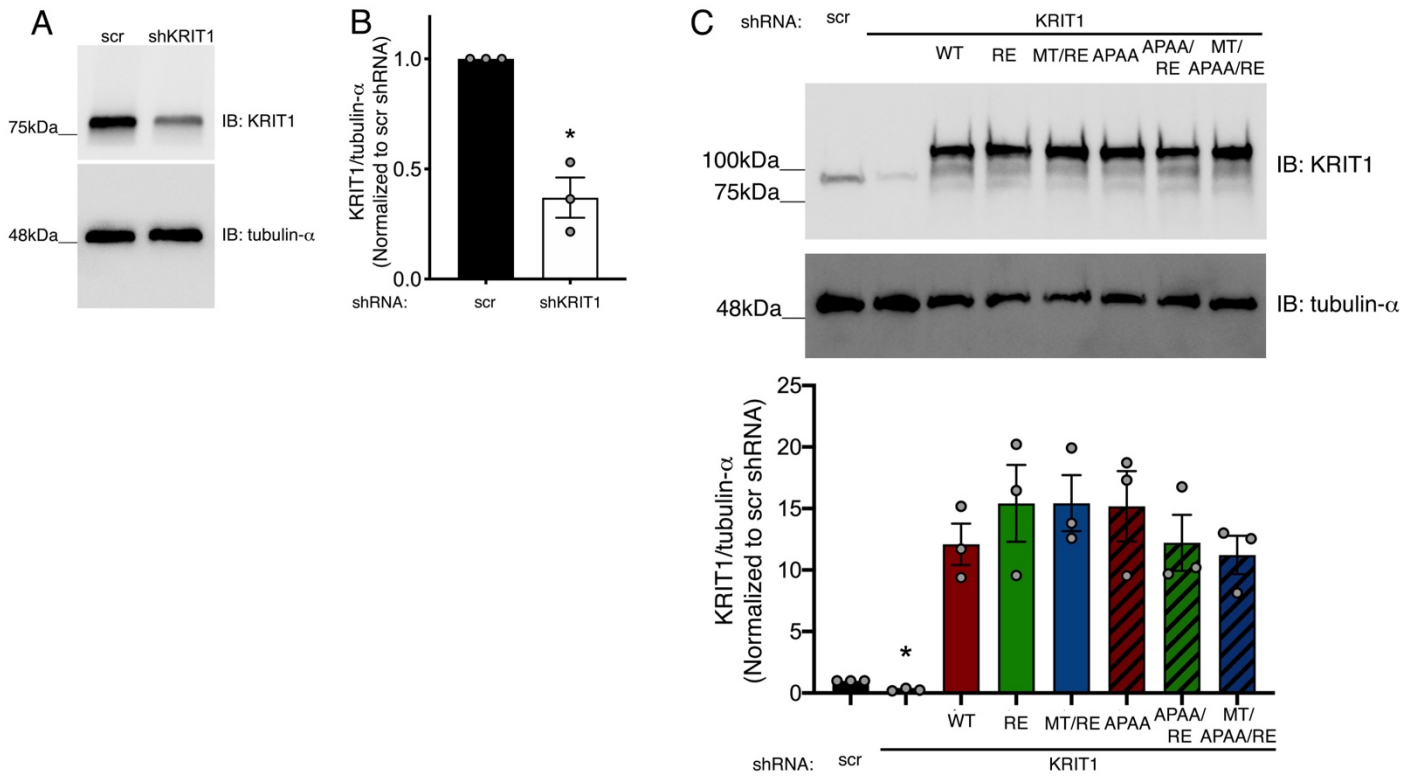

**Fig. S2. KRIT1-targeted shRNA efficiently knocks down endogenous KRIT1 and adenoviral constructs overexpress mCherry-KRIT1.** (A) Western blot and quantification of endogenous KRIT1 in human pulmonary artery endothelial cells (HPAEC) after transduction with either negative control shRNA (scramble) or KRIT1-targeted shRNA (shKRIT1). Tubulin- $\alpha$  blot is shown as a loading control. (B) KRIT1 band density was calculated relative to tubulin- $\alpha$  and normalized to scramble shRNA. Representative Western blots and quantification are from n=3 independent experiments. Data shown are mean  $\pm$  SEM. \* $p < 0.05$  by paired t-test. (C) Overexpression of mCherry-tagged KRIT1 constructs in HPAEC after depletion of endogenous KRIT1. High adenoviral transduction yielded  $\sim 12$ - $15$ x expression of exogenous KRIT1 relative to scramble (endogenous) control. Top KRIT1 bands correspond to mCherry-tagged constructs, and bottom bands are endogenous KRIT1. mCherry-KRIT1 band density was calculated relative to tubulin- $\alpha$  loading control and normalized to scramble shRNA. Representative Western blots and quantification are from n=3 independent experiments. Data shown are mean normalized band densities  $\pm$  SEM. \* $p < 0.05$  by Tukey's post-hoc testing vs. scramble shRNA alone.  $p = 0.0210$  by one-way ANOVA.

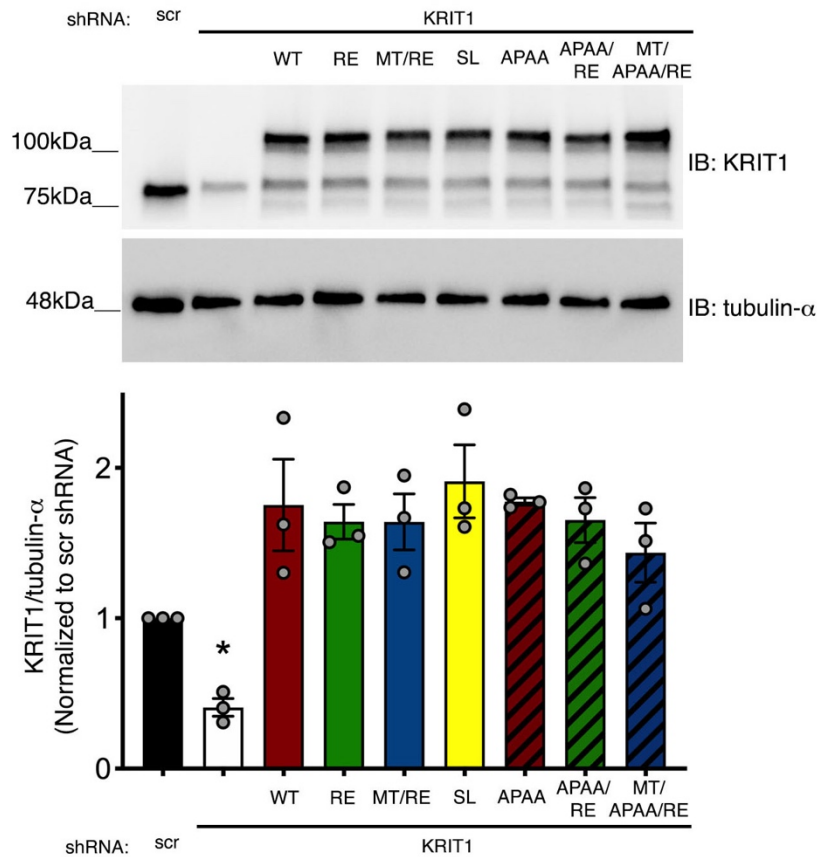

**Fig. S3. KRT11 adenoviral constructs express at roughly endogenous levels in HPAEC.** Expression of mCherry-tagged KRT11 constructs in HPAEC after depletion of endogenous KRT11. Adenoviral transduction yielded ~1.5x expression of exogenous KRT11 relative to scramble (endogenous) control. Top KRT11 bands correspond to mCherry-tagged constructs, and bottom bands are endogenous KRT11. mCherry-KRT11 band density was calculated relative to tubulin- $\alpha$  loading control and normalized to scramble shRNA. Representative Western blots and quantification are from n=3 independent experiments. Data shown are mean normalized band densities  $\pm$  SEM. \* $p < 0.05$  by Tukey's post-hoc testing vs. scramble shRNA alone.  $p = 0.0930$  by one-way ANOVA.

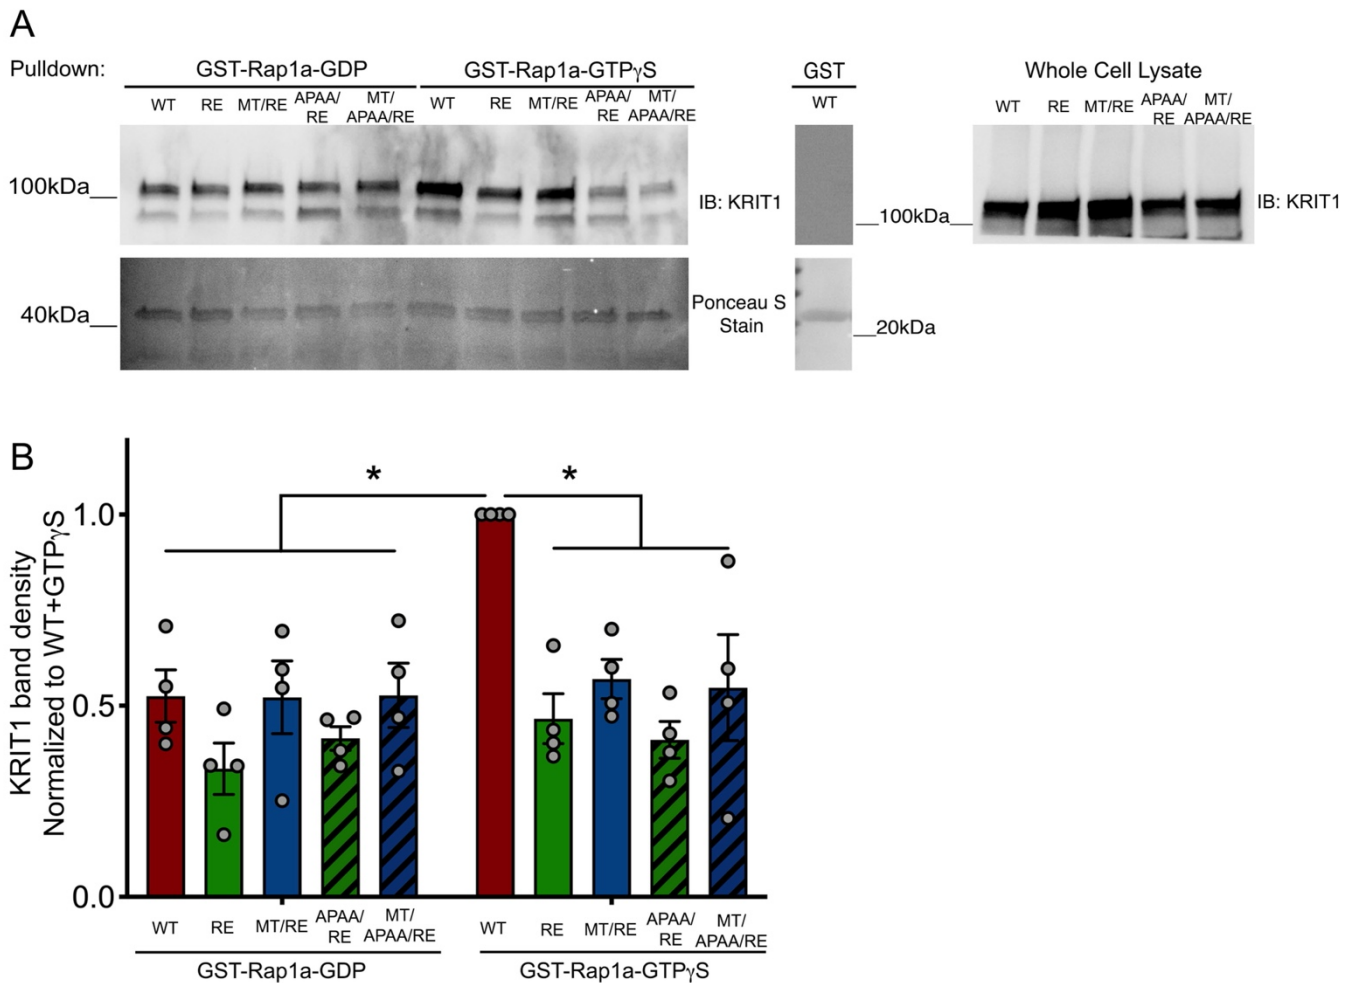

**Fig. S4. R452E mutation inhibits KRIT1-Rap1 binding in APAA constructs.** Lysate from HEK293 cells transfected with KRIT1 constructs was applied to 10ug immobilized recombinant GST-Rap1a(WT) loaded with either GDP or GTP $\gamma$ S. Immobilized GST was also used as a binding control. Pulldowns were Western blotted for KRIT1. Top KRIT1 bands for pulldown correspond to mCherry-tagged constructs, and bottom bands are endogenous KRIT1. Recombinant Rap1a was detected by Ponceau S stain to verify equal loading. Representative blots and densitometry quantification are from n=3 independent experiments. Data shown are mean normalized band densities +/- SEM, normalized to WT KRIT1+Rap1-GTP $\gamma$ S. \*p<0.01 by Tukey's post-hoc testing vs. WT+GTP $\gamma$ S. p=0.0106 by two-way ANOVA.

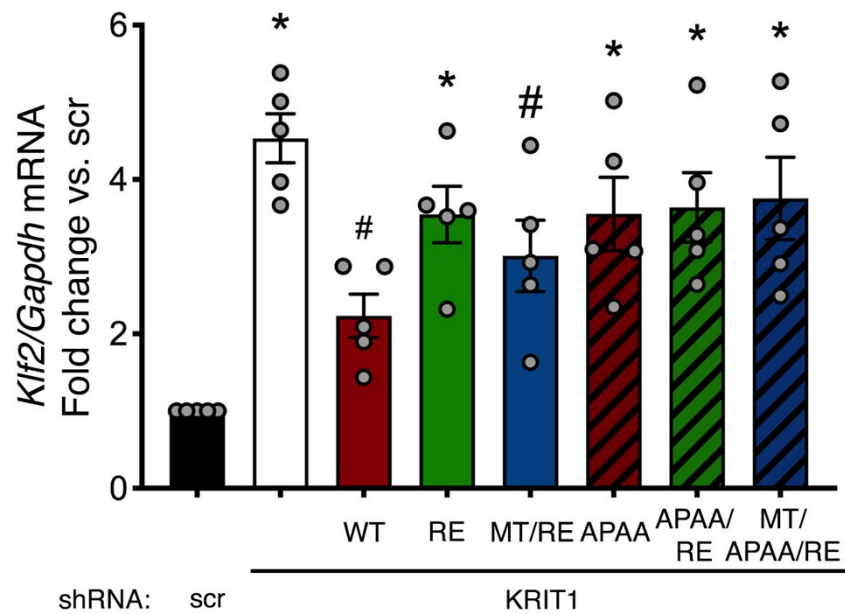

**Fig. S5. *Kif2* mRNA levels are similarly rescued by *KRIT1* mutant constructs.** *Kif2* mRNA levels were measured by semiquantitative reverse transcription PCR (RT-qPCR) in HPAEC depleted of endogenous *KRIT1*. Data shown are mean *Kif2* mRNA levels +/- SEM, relative to *Gapdh* and normalized to scramble shRNA alone (scr), from n=5 independent experiments. \*p<0.05 by Tukey post-hoc testing vs. scramble shRNA alone. #p<0.05 by Tukey post-hoc testing vs. sh*KRIT1* alone. p=0.0011 by one-way ANOVA.

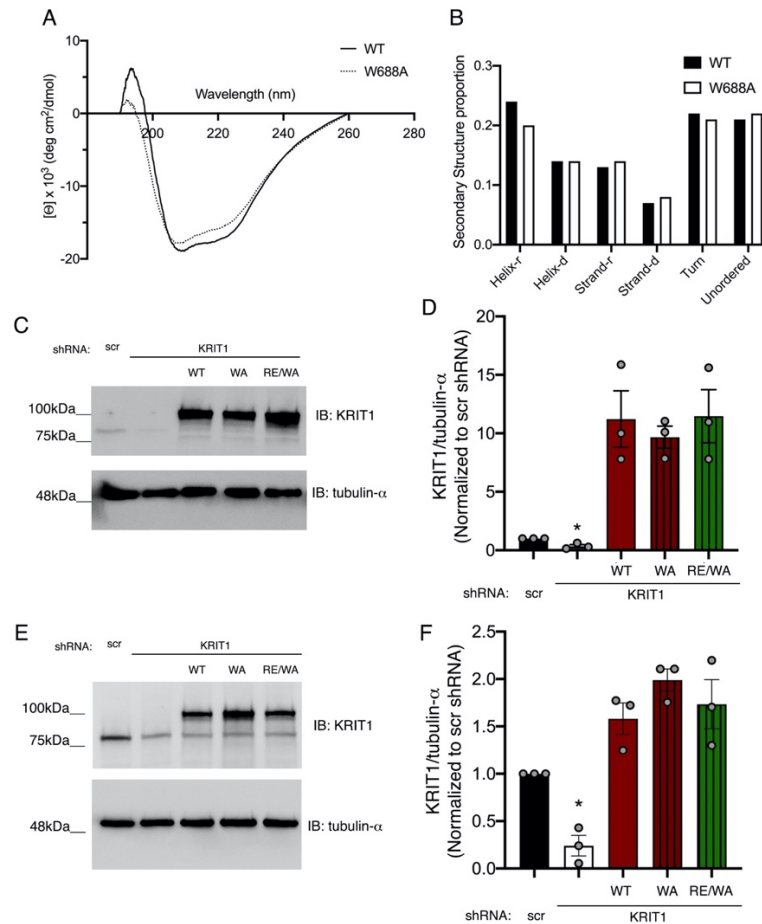

**Fig S6. Circular dichroism and expression levels of KRIT1-W688A.** **(A)** Circular dichroism spectra for WT or W688A KRIT1 FERM domain were obtained scanning from 260 to 190 nm. **(B)** Spectra in panel (A) were analyzed with Dichroweb using the CDSSTR program with reference set 4. Analysis revealed a slightly reduction in regular helical content, as defined by the program. **(C)** Overexpression of mCherry-tagged KRIT1 constructs in HPAEC after depletion of endogenous KRIT1. High adenoviral transduction yielded ~10x expression of exogenous KRIT1 relative to scramble (endogenous) control. Top KRIT1 bands correspond to mCherry-tagged constructs, and bottom bands are endogenous KRIT1. mCherry-KRIT1 band density was calculated relative to tubulin- $\alpha$  loading control and normalized to scramble shRNA. Representative Western blots and quantification are from n=3 independent experiments. Data shown are mean normalized band densities +/- SEM. \*p<0.05 by Tukey's post-hoc testing vs. scramble shRNA alone. p=0.0184 by one-way ANOVA. **(D)** Expression of mCherry-tagged KRIT1 constructs in HPAEC after depletion of endogenous KRIT1. Adenoviral transduction yielded ~1.5x expression of exogenous KRIT1 relative to scramble (endogenous) control. Top KRIT1 bands correspond to mCherry-tagged constructs, and bottom bands are endogenous KRIT1. mCherry-KRIT1 band density was calculated relative to tubulin- $\alpha$  loading control and normalized to scramble shRNA. Representative Western blots and quantification are from n=3 independent experiments. Data shown are mean normalized band densities +/- SEM. \*p<0.05 by Tukey's post-hoc testing vs. scramble shRNA alone. p<0.0001 by one-way ANOVA.

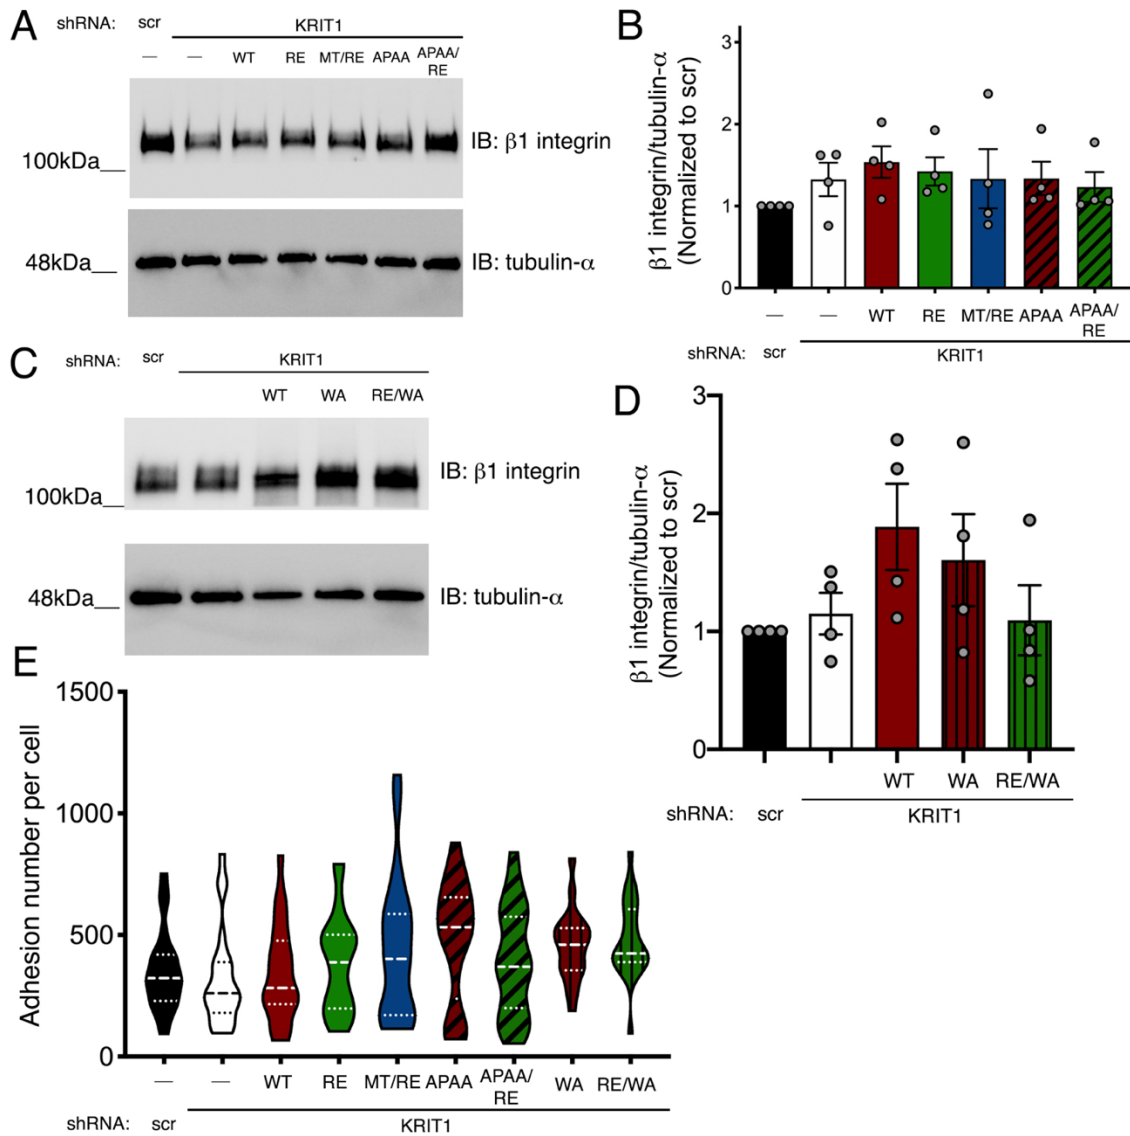

**Fig. S7. Total  $\beta$ 1 integrin expression and adhesion number are unchanged between all conditions.**

**(A) (A-D)** Expression of  $\beta$ 1 integrin is not significantly changed in any condition. Representative Western blot of  $\beta$ 1 integrin **(A, C)** and quantification **(B, D)** show no significant change in  $\beta$ 1 integrin expression relative to tubulin- $\alpha$  (loading control) and normalized to scramble shRNA alone. Data shown in **(B)** and **(D)** are mean normalized band densities  $\pm$  SEM from  $n=3$  independent experiments. **(E)** There was no significant change in the total number of  $\beta$ 1 integrin-containing adhesions after staining with activation-sensitive  $\beta$ 1 integrin antibody (HUTS4). Adhesion characteristics were calculated using Imaris image analysis software. Data are from 20-25 fields per construct across  $n=5$  independent experiments. No significant difference by one-way ANOVA with Bonferroni's post-hoc testing.  $p=0.1548$  by one-way ANOVA. Violin plot in **(E)** represent minimum to maximum values, with quartiles indicated by dotted lines, and median indicated by a dashed line. Data shown are from  $n=20-25$  cells from 5 independent experiments.
